# Supplementary material for: Peatland-VU-NUCOM (PVN 1.0): Using dynamic PFTs to model peatland vegetation, CH 4 and CO 2 emissions
Source: Copernicus journal article supplement (doi:10.5194/gmd-2023-48), 2023-03-29
Supplement: Supplementary file 1 [file gmd-2023-48-supplement.pdf]

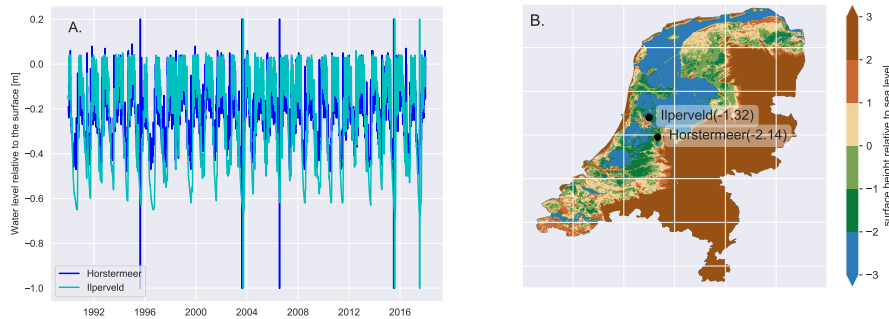

**Figure S1.** A. The water table heights relative to the land surface over the simulated period, 1990-2018. The sign convention in this paper is that the water table depth is assigned as a negative value when the water table is below the surface. B. The location of the 2 field sites and the land surface height in the Netherlands.

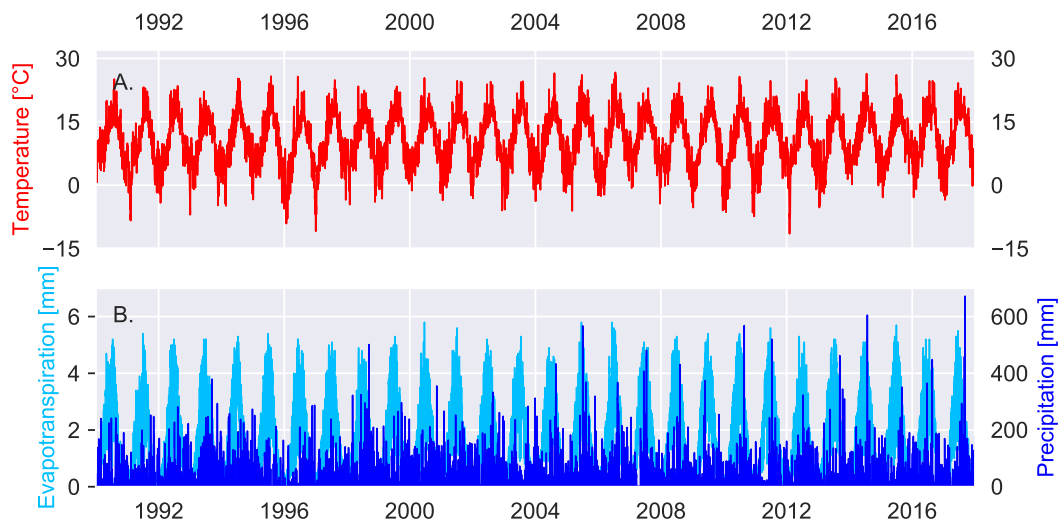

**Figure S2.** Daily precipitation, evapotranspiration, and temperature observations recorded at nearby weather station, Schiphol. Shown for the years 1990 - 2019.

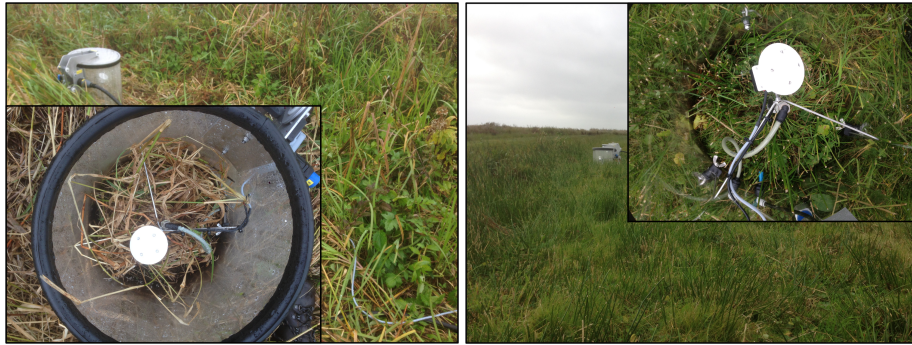

**Figure S3.** Examples of the vegetation and the chambers at the Horstermeer (left) and the Ilperveld (right) sites.

**Table S1.** Range and scope of current peatland models using PFTs. We've only counted the number of peatland specific PFTs. Some models use more PFTs than what have been counted here.

| Model                     | Gridded | Site specific | PFT competition | CO <sub>2</sub> scheme | CH <sub>4</sub> scheme | Citation                                                               |
|---------------------------|---------|---------------|-----------------|------------------------|------------------------|------------------------------------------------------------------------|
| PEATBOG                   | ✓       | ✓             | ✓               | ✓                      | ✓                      | Wu et al. (2016)                                                       |
| LPJ-WHyMe                 | ✓       | -             | ✓               | ✓                      | ✓                      | Wania et al. (2010)                                                    |
| MILENNIA                  | -       | ✓             | -               | ✓                      | ✓                      | Heinemeyer et al. (2010)                                               |
| CH4MOD <sub>wetland</sub> | -       | ✓             | -               | -                      | ✓                      | Li et al. (2016)                                                       |
| McGill Wetland Model      | -       | ✓             | -               | ✓                      | -                      | Wu et al. (2011)                                                       |
| Holocene Peat Model       | -       | ✓             | ✓               | -                      | -                      | Frolking et al. (2010)                                                 |
| CLASS3.6-CTEM             | ✓       | -             | -               | ✓                      | -                      | Wu et al. (2016)                                                       |
| ORCHIDEE-PEAT             | ✓       | ✓             | -               | ✓                      | -                      | Largerone et al. (2018); Krinner et al. (2005); Ringeval et al. (2010) |
| LPJ-GUESS                 | ✓       | ✓             | ✓               | ✓                      | -                      | Smith et al. (2001); Chaudhary et al. (2017)                           |
| Bauer                     | -       | ✓             | -               | ✓                      | -                      | Bauer (2004)                                                           |
| LPJ-WHy                   | ✓       | -             | ✓               | -                      | -                      | Wania et al. (2009)                                                    |
| GUESS-ROMUL               | ✓       | -             | -               | ✓                      | -                      | Yurova et al. (2007)                                                   |
| DYPTOP                    | ✓       | ✓             | -               | -                      | -                      | Stocker et al. (2014)                                                  |
| LPX-Bern DGVM             | ✓       | -             | ✓               | -                      | -                      | Müller and Joos (2020)                                                 |
| Community Land Model      | ✓       | ✓             | -               | -                      | -                      | Shi et al. (2015)                                                      |
| CaMP                      | -       | ✓             | -               | ✓                      | ✓                      | Bona et al. (2020)                                                     |
| NUCOM                     | -       | ✓             | ✓               | ✓                      | -                      | Heijmans et al. (2008)                                                 |
| PEATLAND-VU               | -       | ✓             | -               | ✓                      | ✓                      | van Huissteden et al. (2006)                                           |
| PVN                       | -       | ✓             | ✓               | ✓                      | ✓                      | This publication                                                       |

**Table S2.** References for parameters in Table 2. VH06 values informed by Peatland-VU van Huissteden et al. (2006, 2009). H16 (HA16) refers to parameters taken directly (adapted) from the NUCOM-BOG model Heijmans et al. (2008). W16 (WA16) refers to values taken directly (adapted) Wu et al. (2016). W09 refers to values taken from Wania et al. (2009). TRY refers to values taken from the TRY database 5.0 (www.try-db.org) Kattge et al. (2020, 2011). W11 (WA11) refers to values taken directly (adapted) Wu et al. (2011). SA03 refers to values informed by Sitch et al. (2003).

| Parameter            | Tall grasses | Sedges | Typha | Sphagnum | Brown moss | Short grass |
|----------------------|--------------|--------|-------|----------|------------|-------------|
| BiomassSenescence    | HA16         | HA16   | HA16  | H16      | H16        | HA16        |
| AutumnLitter         | VH06         | VH06   | VH06  | H16      | H16        | TRY         |
| CBiomassRatio        | WA11         | WA11   | WA11  | W11      | W11        | WA11        |
| ShootsFactor         | WA16         | W16    | WA16  | H16      | H16        | HA16        |
| MaxCanopyHeight      | TRY          | TRY    | TRY   | H16      | H16        | TRY         |
| Temp_MaxPhoto        | WA16         | W16    | WA16  | W16      | W16        | WA16        |
| Temp_MinPhoto        | WA16         | W16    | WA16  | W16      | W16        | WA16        |
| TMinGrowth           | TRY          | HA16   | HA16  | H16      | H16        | HA16        |
| TOptMinGrowth        | TRY          | TRY    | TRY   | H16      | H16        | HA16        |
| TOptMaxGrowth        | TRY          | TRY    | TRY   | H16      | H16        | HA16        |
| TMaxGrowth           | TRY          | TRY    | TRY   | H16      | H16        | HA16        |
| LeafRespirationCoeff | SA03         | SA03   | SA03  | SA03     | SA03       | SA03        |
| MaxGrowthRate        | HA16         | HA16   | HA16  | H16      | H16        | HA16        |
| SpecificLeafArea     | HA16         | HA16   | HA16  | H16      | H16        | TRY         |
| MinLAI               | WA16         | W16    | WA16  | WA16     | WA16       | WA16        |
| MaxLAI               | WA16         | W16    | WA16  | WA16     | WA16       | WA16        |
| LightExtCoeff        | H16          | H16    | H16   | H16      | H16        | TRY         |
| MethanePlantOx       | VH06         | VH06   | VH06  | VH06     | VH06       | VH06        |
| MethanePType         | VH06         | VH06   | VH06  | VH06     | VH06       | VH06        |
| MaxRootDepth         | WA16         | W16    | WA16  | WA16     | WA16       | WA16        |
| RootSenescence       | W09          | W09    | W09   | HA16     | HA16       | HA16        |
| ExudateFactor        | VH06         | VH06   | VH06  | VH06     | VH06       | VH06        |
| SpringCorrection     | VH06         | VH06   | VH06  | VH06     | VH06       | VH06        |
| LitterConversion     | VH06         | VH06   | VH06  | VH06     | VH06       | VH06        |
| ResistFrac           | SA03         | SA03   | SA03  | SA03     | SA03       | SA03        |
| AssimDissim          | VH06         | VH06   | VH06  | VH06     | VH06       | VH06        |
| WLMIn                | TRY          | TRY    | TRY   | H16      | H16        | HA16        |
| WLOptMin             | TRY          | TRY    | TRY   | H16      | H16        | HA16        |
| WLOptMax             | TRY          | TRY    | TRY   | H16      | H16        | HA16        |
| WLMax                | TRY          | TRY    | TRY   | H16      | H16        | HA16        |



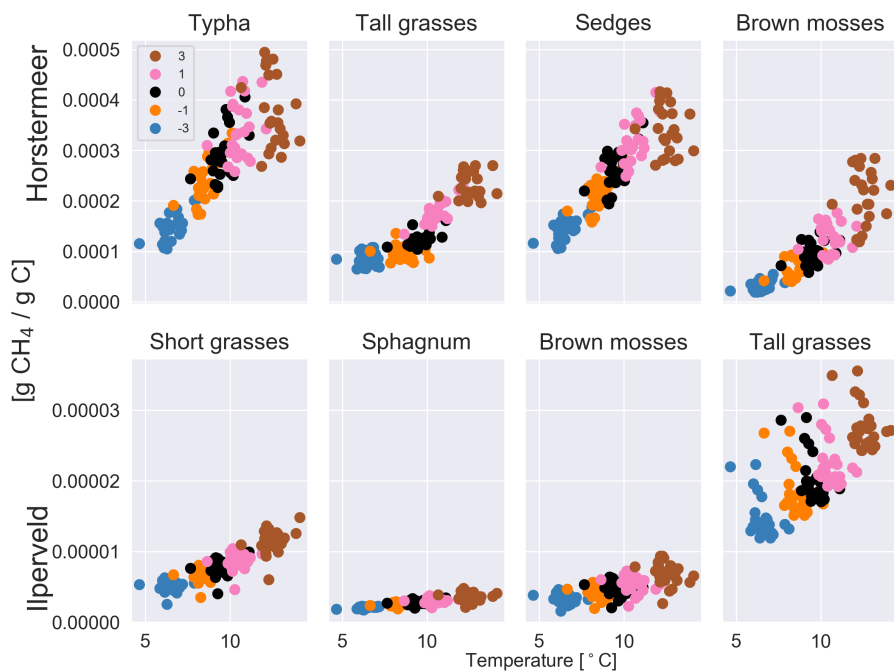

**Figure S4.** The results of the sensitivity tests show the relationship between different temperature inputs and the mean annual daily plant transported CH<sub>4</sub>, for each of the PFTs at the Horstermeer site (top row) and Ilperveld site (bottom row). Temperature input was increased and decreased by 1 & 3 °C, respectively. The legend shows the input change in °C where, ± signs in front of the legend labels show the direction of change. Note the different y axes between the top and bottom panels.

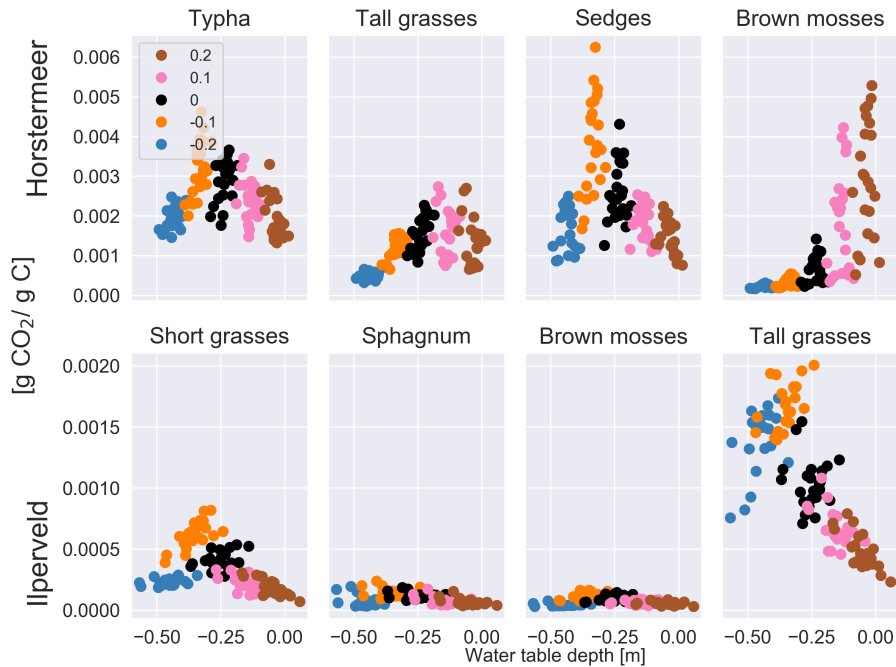

**Figure S5.** The results of the sensitivity tests show the relationship between different water level inputs and the mean annual daily below-ground CO<sub>2</sub> flux, for each of the PFTs at the Horstermeer site (top row) and Ilperveld site (bottom row). Water level input was decreased by 0.1 & 0.2 m and increased by 0.1 & 0.2 m, respectively. The legend shows the input change, where  $\pm$  signs in front of the legend labels indicate the direction of change. Note the different y axes between the top and bottom panels.

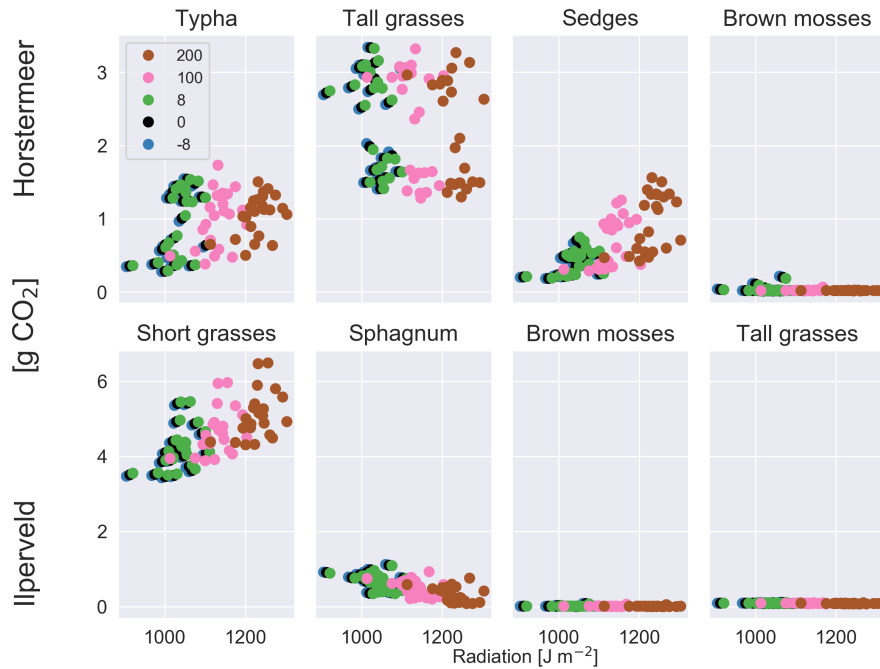

**Figure S6.** The results of the sensitivity tests show the relationship between the annual mean daily GPP and different radiation inputs, for each of the PFTs at the Horstermeer site (top row) and Ilperveld site (bottom row). Radiation input was increased by 8, 100 and  $200 J m^{-2}$ , and decreased by  $8 J m^{-2}$ . The legend shows the input change in  $J m^{-2}$  where,  $\pm$  signs in front of the legend labels show the direction of change.

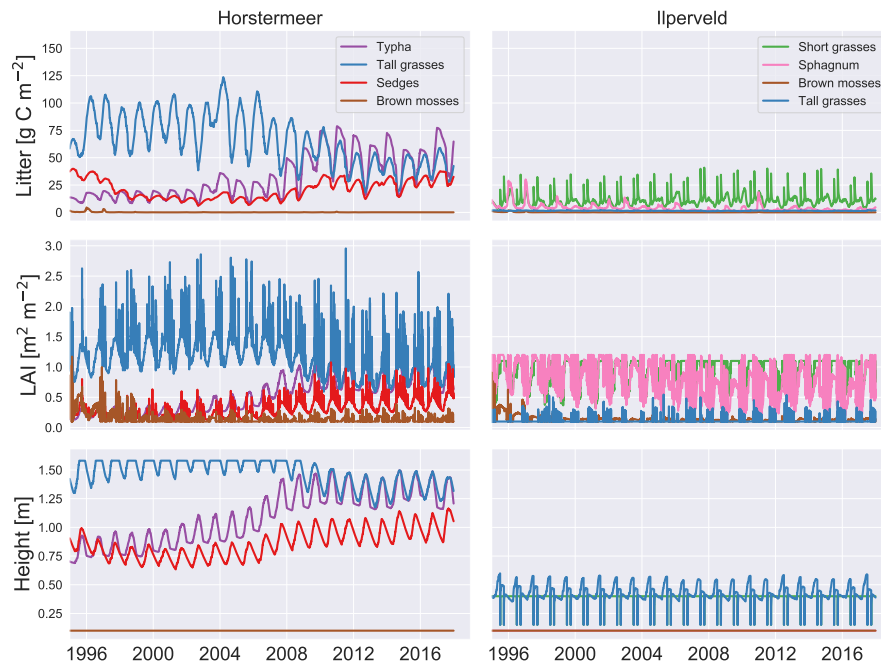

**Figure S7.** Vegetation dynamics. The results of the Horstermeer site simulation are represented in the left column and the results of the Ilperveld site simulation are represented in the right column.

## References

- Bauer, I. E.: Modelling effects of litter quality and environment on peat accumulation over different time-scales, *Journal of Ecology*, 92, 661–674, <https://doi.org/10.1111/j.0022-0477.2004.00905.x>, 2004.
- 5 Bona, K. A., Shaw, C., Thompson, D. K., Hararuk, O., Webster, K., Zhang, G., Voicu, M., and Kurz, W. A.: The Canadian model for peatlands (CaMP): A peatland carbon model for national greenhouse gas reporting, *Ecological Modelling*, 431, 109–164, <https://doi.org/10.1016/j.ecolmodel.2020.109164>, <https://doi.org/10.1016/j.ecolmodel.2020.109164>, 2020.
- Chaudhary, N., Miller, P. A., and Smith, B.: Modelling Holocene peatland dynamics with an individual-based dynamic vegetation model, *Biogeosciences*, 14, 2571–2596, <https://doi.org/10.5194/bg-14-2571-2017>, 2017.
- 10 Frolking, S., Roulet, N. T., Tuittila, E., Bubier, J. L., Quillet, A., Talbot, J., and Richard, P. J. H.: A new model of Holocene peatland net primary production, decomposition, water balance, and peat accumulation, *Earth System Dynamics*, 1, 1–21, <https://doi.org/10.5194/esd-1-1-2010>, <https://esd.copernicus.org/preprints/1/115/2010/https://esd.copernicus.org/articles/1/1/2010/>, 2010.
- Heijmans, M. M., Mauquoy, D., Van Geel, B., and Berendse, F.: Long-term effects of climate change on vegetation and carbon dynamics in peat bogs, *Journal of Vegetation Science*, 19, 307–320, <https://doi.org/10.3170/2008-8-18368>, <https://www.scopus.com/inward/record.url?eid=2-s2.0-41849115693&partnerID=40&md5=650f510b7f8fb783728dc3e00073b873>, 2008.
- 15 Heinemeyer, A., Croft, S., Garnett, M. H., Gloor, E., Holden, J., Lomas, M. R., and Ineson, P.: The MILLENNIA peat cohort model: Predicting past, present and future soil carbon budgets and fluxes under changing climates in peatlands, *Climate Research*, 45, 207–226, <https://doi.org/10.3354/cr00928>, 2010.
- Kattge, J., Díaz, S., Lavorel, S., Prentice, I. C., Leadley, P., Bönsch, G., Garnier, E., Westoby, M., Reich, P. B., Wright, I. J., Cornelissen, J. H., Violle, C., Harrison, S. P., Van Bodegom, P. M., Reichstein, M., Enquist, B. J., Soudzilovskaia, N. A., Ackerly, D. D., Anand, M., 20 Atkin, O., Bahn, M., Baker, T. R., Baldocchi, D., Bekker, R., Blanco, C. C., Blonder, B., Bond, W. J., Bradstock, R., Bunker, D. E., Casanoves, F., Cavender-Bares, J., Chambers, J. Q., Chapin, F. S., Chave, J., Coomes, D., Cornwell, W. K., Craine, J. M., Dobrin, B. H., Duarte, L., Durka, W., Elser, J., Esser, G., Estiarte, M., Fagan, W. F., Fang, J., Fernández-Méndez, F., Fidelis, A., Finegan, B., Flores, O., Ford, H., Frank, D., Freschet, G. T., Fyllas, N. M., Gallagher, R. V., Green, W. A., Gutierrez, A. G., Hickler, T., Higgins, S. I., Hodgson, J. G., Jalili, A., Jansen, S., Joly, C. A., Kerkhoff, A. J., Kirkup, D., Kitajima, K., Kleyer, M., Klotz, S., Knops, J. M., Kramer, K., Kühn, 25 I., Kurokawa, H., Laughlin, D., Lee, T. D., Leishman, M., Lens, F., Lenz, T., Lewis, S. L., Lloyd, J., Llusà, J., Louault, F., Ma, S., Mahecha, M. D., Manning, P., Massad, T., Medlyn, B. E., Messier, J., Moles, A. T., Müller, S. C., Nadrowski, K., Naeem, S., Niinemets, Ü., Nöllert, S., Nüske, A., Ogaya, R., Oleksyn, J., Onipchenko, V. G., Onoda, Y., Ordoñez, J., Overbeck, G., Ozinga, W. A., Patiño, S., Paula, S., Pausas, J. G., Peñuelas, J., Phillips, O. L., Pillar, V., Poorter, H., Poorter, L., Poschod, P., Prinzing, A., Proulx, R., Rammig, A., Reinsch, S., Reu, B., Sack, L., Salgado-Negret, B., Sardans, J., Shiodera, S., Shipley, B., Siefert, A., Sosinski, E., Soussana, J. F., Swaine, 30 E., Swenson, N., Thompson, K., Thornton, P., Waldram, M., Weiher, E., White, M., White, S., Wright, S. J., Yguel, B., Zaehle, S., Zanne, A. E., and Wirth, C.: TRY - a global database of plant traits, *Global Change Biology*, 17, 2905–2935, <https://doi.org/10.1111/j.1365-2486.2011.02451.x>, <http://doi.wiley.com/10.1111/j.1365-2486.2011.02451.x>, <http://www.ncbi.nlm.nih.gov/pubmed/17388899>, <https://onlinelibrary.wiley.com/doi/10.1111/j.1469-8137.2007.02011.x>, <https://onlinelibrary.wiley.com/doi/10.1111/j.1365-2486.2011.02451.x>, 2011.
- 35 Kattge, J., Bönsch, G., Díaz, S., Lavorel, S., Prentice, I. C., Leadley, P., Tautenhahn, S., Werner, G. D., Aakala, T., Abedi, M., Acosta, A. T., Adamidis, G. C., Adamson, K., Aiba, M., Albert, C. H., Alcántara, J. M., Alcázar, C. C., Aleixo, I., Ali, H., Amiaud, B., Ammer, C., Amoroso, M. M., Anand, M., Anderson, C., Anten, N., Antos, J., Apgaua, D. M. G., Ashman, T. L., Asmara, D. H., Asner, G. P., Aspinwall, M., Atkin, O., Aubin, I., Baastrop-Spohr, L., Bahalkheh, K., Bahn, M., Baker, T., Baker, W. J., Bakker, J. P., Baldocchi, D., Baltzer, J., Banerjee, A., Baranger, A., Barlow, J., Barneche, D. R., Baruch, Z., Bastianelli, D., Battles, J., Bauerle, W., Bauters, M., 40 Bazzato, E., Beckmann, M., Beeckman, H., Beierkuhnlein, C., Bekker, R., Belfry, G., Belluau, M., Beloiu, M., Benavides, R., Benomar, L., Berdugo-Lattke, M. L., Berenguer, E., Bergamin, R., Bergmann, J., Bergmann Carlucci, M., Berner, L., Bernhardt-Römermann, M., Bigler, C., Bjorkman, A. D., Blackman, C., Blanco, C., Blonder, B., Blumenthal, D., Bocanegra-González, K. T., Boeckx, P., Bohlman, S., Böhning-Gaese, K., Boisvert-Marsh, L., Bond, W., Bond-Lamberty, B., Boom, A., Boonman, C. C., Bordin, K., Boughton, E. H., Boukili, V., Bowman, D. M., Bravo, S., Brendel, M. R., Broadley, M. R., Brown, K. A., Bruelheide, H., Brunnich, F., Bruun, H. H., Bruy, D., 45 Buchanan, S. W., Bucher, S. F., Buchmann, N., Buitenwerf, R., Bunker, D. E., Bürger, J., Burrascano, S., Burslem, D. F., Butterfield, B. J., Byun, C., Marques, M., Scalon, M. C., Caccianiga, M., Cadotte, M., Cailleret, M., Camac, J., Camarero, J. J., Company, C., Campetella, G., Campos, J. A., Cano-Arboleda, L., Canullo, R., Carboognani, M., Carvalho, F., Casanoves, F., Castagneyrol, B., Catford, J. A., Cavender-Bares, J., Cerabolini, B. E., Cervellini, M., Chacón-Madrjal, E., Chapin, K., Chapin, F. S., Chelli, S., Chen, S. C., Chen, A., Cherubini, P., Chianucci, F., Choat, B., Chung, K. S., Chytrý, M., Ciccarelli, D., Coll, L., Collins, C. G., Conti, L., Coomes, D., Cornelissen, J. H., 50 Cornwell, W. K., Corona, P., Coyea, M., Craine, J., Craven, D., Crowsigt, J. P., Cseceserits, A., Cufar, K., Cuntz, M., da Silva, A. C., Dahlin, K. M., Dainese, M., Dalke, I., Dalle Fratte, M., Dang-Le, A. T., Danihelka, J., Dannoura, M., Dawson, S., de Beer, A. J., De Frutos, A., De Long, J. R., Dechant, B., Delagrangé, S., Delpierre, N., Derroire, G., Dias, A. S., Diaz-Toribio, M. H., Dimitrakopoulos,

P. G., Dobrowolski, M., Doktor, D., Dřevojan, P., Dong, N., Dransfield, J., Dressler, S., Duarte, L., Ducouret, E., Dullinger, S., Durka, W., Duursma, R., Dymova, O., E-Vojtkó, A., Eckstein, R. L., Ejtehadi, H., Elser, J., Emilio, T., Engemann, K., Erfanian, M. B., Erfmeier, A., Esquivel-Muelbert, A., Esser, G., Estiarte, M., Domingues, T. F., Fagan, W. F., Fagúndez, J., Falster, D. S., Fan, Y., Fang, J., Farris, E., Fazlioglu, F., Feng, Y., Fernandez-Mendez, F., Ferrara, C., Ferreira, J., Fidelis, A., Finegan, B., Firn, J., Flowers, T. J., Flynn, D. F., Fontana, V., Forey, E., Forgiarini, C., François, L., Frangipani, M., Frank, D., Frenette-Dussault, C., Freschet, G. T., Fry, E. L., Fyllas, N. M., Mazzochini, G. G., Gachet, S., Gallagher, R., Ganade, G., Ganga, F., García-Palacios, P., Gargaglione, V., Garnier, E., Garrido, J. L., de Gasper, A. L., Gea-Izquierdo, G., Gibson, D., Gillison, A. N., Giroldo, A., Glasenhardt, M. C., Gleason, S., Gliesch, M., Goldberg, E., Gödel, B., Gonzalez-Akre, E., Gonzalez-Andujar, J. L., González-Melo, A., González-Robles, A., Graae, B. J., Granda, E., Graves, S., Green, W. A., Gregor, T., Gross, N., Guerin, G. R., Günther, A., Gutiérrez, A. G., Haddock, L., Haines, A., Hall, J., Hambuckers, A., Han, W., Harrison, S. P., Hattingh, W., Hawes, J. E., He, T., He, P., Heberling, J. M., Helm, A., Hempel, S., Hentschel, J., Hérault, B., Hereş, A. M., Herz, K., Heuertz, M., Hickler, T., Hietz, P., Higuchi, P., Hipp, A. L., Hiron, A., Hock, M., Hogan, J. A., Holl, K., Honnay, O., Hornstein, D., Hou, E., Hough-Snee, N., Hovstad, K. A., Ichie, T., Igić, B., Illa, E., Isaac, M., Ishihara, M., Ivanov, L., Ivanova, L., Iversen, C. M., Izquierdo, J., Jackson, R. B., Jackson, B., Jactel, H., Jagodzinski, A. M., Jandt, U., Jansen, S., Jenkins, T., Jentsch, A., Jespersen, J. R. P., Jiang, G. F., Johansen, J. L., Johnson, D., Jokela, E. J., Joly, C. A., Jordan, G. J., Joseph, G. S., Junaedi, D., Junker, R. R., Justes, E., Kabzems, R., Kane, J., Kaplan, Z., Kattenborn, T., Kavelenova, L., Kearsley, E., Kempel, A., Kenzo, T., Kerckhoff, A., Khalil, M. I., Kinlock, N. L., Kissling, W. D., Kitajima, K., Kitzberger, T., Kjeller, R., Klein, T., Kleyer, M., Klimešová, J., Klipel, J., Kloeppel, B., Klotz, S., Knops, J. M., Kohyama, T., Koike, F., Kollmann, J., Komac, B., Komatsu, K., König, C., Kraft, N. J., Kramer, K., Kref, H., Kühn, I., Kumarathunge, D., Kuppler, J., Kurokawa, H., Kurosawa, Y., Kuyah, S., Laclau, J. P., Laffleur, B., Lallai, E., Lamb, E., Lamprecht, A., Larkin, D. J., Laughlin, D., Le Bagousse-Pinguet, Y., le Maire, G., le Roux, P. C., le Roux, E., Lee, T., Lens, F., Lewis, S. L., Lhotsky, B., Li, Y., Li, X., Lichstein, J. W., Liebergesell, M., Lim, J. Y., Lin, Y. S., Linares, J. C., Liu, C., Liu, D., Liu, U., Livingstone, S., Llusà, J., Lohbeck, M., López-García, Á., Lopez-Gonzalez, G., Lososová, Z., Louault, F., Lukács, B. A., Lukeš, P., Luo, Y., Lussu, M., Ma, S., Maciel Rabelo Pereira, C., Mack, M., Maire, V., Mäkelä, A., Mäkinen, H., Malhado, A. C. M., Mallik, A., Manning, P., Manzoni, S., Marchetti, Z., Marchino, L., Marcilio-Silva, V., Marcon, E., Marignani, M., Markesteijn, L., Martin, A., Martínez-Garza, C., Martínez-Vilalta, J., Mašková, T., Mason, K., Mason, N., Massad, T. J., Masse, J., Mayrose, I., McCarthy, J., McCormack, M. L., McCulloh, K., McFadden, I. R., McGill, B. J., McPartland, M. Y., Medeiros, J. S., Medlyn, B., Meerts, P., Mehrabi, Z., Meir, P., Melo, F. P., Mencuccini, M., Meredieu, C., Messier, J., Mészáros, I., Metsaranta, J., Michaletz, S. T., Michelaki, C., Migalina, S., Milla, R., Miller, J. E., Minden, V., Ming, R., Mokany, K., Moles, A. T., Molnár, A., Molofsky, J., Molz, M., Montgomery, R. A., Monty, A., Moravcová, L., Moreno-Martínez, A., Moretti, M., Mori, A. S., Mori, S., Morris, D., Morrison, J., Mucina, L., Mueller, S., Muir, C. D., Müller, S. C., Munoz, F., Myers-Smith, I. H., Myster, R. W., Nagano, M., Naidu, S., Narayanan, A., Natesan, B., Negoita, L., Nelson, A. S., Neuschulz, E. L., Ni, J., Niedrist, G., Nieto, J., Niinemets, Ü., Nolan, R., Nottebrock, H., Nouvellon, Y., Novakovskiy, A., Nystuen, K. O., O'Grady, A., O'Hara, K., O'Reilly-Nugent, A., Oakley, S., Oberhuber, W., Ohtsuka, T., Oliveira, R., Öllerer, K., Olson, M. E., Onipchenko, V., Onoda, Y., Onstein, R. E., Ordóñez, J. C., Osada, N., Ostonen, I., Ottaviani, G., Otto, S., Overbeck, G. E., Ozinga, W. A., Pahl, A. T., Paine, C. E., Pakeman, R. J., Papageorgiou, A. C., Parfionova, E., Pärtel, M., Patacca, M., Paula, S., Paule, J., Pauli, H., Pausas, J. G., Peco, B., Penuelas, J., Perea, A., Peri, P. L., Petisco-Souza, A. C., Petraglia, A., Petritan, A. M., Phillips, O. L., Pierce, S., Pillar, V. D., Pisek, J., Pomogaybin, A., Poorter, H., Portsmouth, A., Poschlod, P., Potvin, C., Pounds, D., Powell, A. S., Power, S. A., Prinzing, A., Puglielli, G., Pyšek, P., Raavel, V., Rammig, A., Ransijn, J., Ray, C. A., Reich, P. B., Reichstein, M., Reid, D. E., Réjou-Méchain, M., de Dios, V. R., Ribeiro, S., Richardson, S., Riibak, K., Rillig, M. C., Riviera, F., Robert, E. M., Roberts, S., Robroek, B., Roddy, A., Rodrigues, A. V., Rogers, A., Rollinson, E., Rolo, V., Römermann, C., Ronzhina, D., Roscher, C., Rosell, J. A., Rosenfield, M. F., Rossi, C., Roy, D. B., Royer-Tardif, S., Rüger, N., Ruiz-Peinado, R., Rumpf, S. B., Rusch, G. M., Ryo, M., Sack, L., Saldaña, A., Salgado-Negret, B., Salguero-Gomez, R., Santa-Regina, I., Santacruz-García, A. C., Santos, J., Sardans, J., Schamp, B., Scherer-Lorenzen, M., Schleuning, M., Schmid, B., Schmidt, M., Schmitt, S., Schneider, J. V., Schowaneck, S. D., Schrader, J., Schrodt, F., Schuldt, B., Schurr, F., Selaya Garvizu, G., Semchenko, M., Seymour, C., Sfair, J. C., Sharpe, J. M., Sheppard, C. S., Sheremetiev, S., Shiodera, S., Shipley, B., Shovon, T. A., Siebenkäs, A., Sierra, C., Silva, V., Silva, M., Sitzia, T., Sjöman, H., Slot, M., Smith, N. G., Sodhi, D., Soltis, P., Soltis, D., Somers, B., Sonnier, G., Sørensen, M. V., Sosinski, E. E., Soudzilovskaia, N. A., Souza, A. F., Spasojevic, M., Sperandii, M. G., Stan, A. B., Stegen, J., Steinbauer, K., Stephan, J. G., Sterck, F., Stojanovic, D. B., Strydom, T., Suarez, M. L., Svenning, J. C., Svitková, I., Svitok, M., Svoboda, M., Swaine, E., Swenson, N., Tabarelli, M., Takagi, K., Tappeiner, U., Tarifa, R., Tauougourdeau, S., Tavsanoğlu, C., te Beest, M., Tedersoo, L., Thiffault, N., Thom, D., Thomas, E., Thompson, K., Thornton, P. E., Thuiller, W., Tichý, L., Tissue, D., Tjoelker, M. G., Tng, D. Y. P., Tobias, J., Török, P., Tarin, T., Torres-Ruiz, J. M., Tóthmérész, B., Treurnicht, M., Trivellone, V., Trolliet, F., Trotsiuk, V., Tsakalos, J. L., Tsiripidis, I., Tysklind, N., Umehara, T., Usoltsev, V., Vadeboncoeur, M., Vaezi, J., Valladares, F., Vamosi, J., van Bodegom, P. M., van Breugel, M., Van Cleemput, E., van de Weg, M., van der Werwe, S., van der Plas, F., van der Sande, M. T., van Kleunen, M., Van Meerbeek, K., Vanderwel, M., Vanselow, K. A., Vårhammar, A., Varone, L., Vasquez Valderrama, M. Y., Vassilev, K., Vellend, M., Veneklaas, E. J., Verbeeck, H., Verheyen, K., Vibrans, A., Vieira, I., Villacís, J., Violle, C., Vivek, P., Wagner, K., Waldram, M., Waldron, A., Walker, A. P., Waller, M., Walther, G., Wang, H., Wang, F., Wang, W., Watkins, H., Watkins, J., Weber, U., Weedon, J. T.,

- Wei, L., Weigelt, P., Weiher, E., Wells, A. W., Wellstein, C., Wenk, E., Westoby, M., Westwood, A., White, P. J., Whitten, M., Williams, M., Winkler, D. E., Winter, K., Womack, C., Wright, I. J., Wright, S. J., Wright, J., Pinho, B. X., Ximenes, F., Yamada, T., Yamaji, K., Yanai, R., Yankov, N., Yguel, B., Zanini, K. J., Zanne, A. E., Zelený, D., Zhao, Y. P., Zheng, J., Zheng, J., Ziemińska, K., Zirbel, C. R., Zizka, G., Zo-Bi, I. C., Zotz, G., and Wirth, C.: TRY plant trait database – enhanced coverage and open access, *Global Change Biology*, 26, 119–188, <https://doi.org/10.1111/gcb.14904>, 2020.
- 110 Krinner, G., Viovy, N., de Noblet-Ducoudré, N., Ogée, J., Polcher, J., Friedlingstein, P., Ciais, P., Sitch, S., and Prentice, I. C.: A dynamic global vegetation model for studies of the coupled atmosphere-biosphere system, *Global Biogeochemical Cycles*, 19, 1–33, <https://doi.org/10.1029/2003GB002199>, <http://doi.wiley.com/10.1029/2003GB002199>, 2005.
- 115 Largeron, C., Krinner, G., Ciais, P., and Brutel-Vuilmet, C.: Implementing northern peatlands in a global land surface model: Description and evaluation in the ORCHIDEE high-latitude version model (ORC-HL-PEAT), *Geoscientific Model Development*, 11, 3279–3297, <https://doi.org/10.5194/gmd-11-3279-2018>, 2018.
- Li, T., Raivonen, M., Alekseychik, P., Aurela, M., Lohila, A., Zheng, X., Zhang, Q., Wang, G., Mammarella, I., Rinne, J., Yu, L., Xie, B., Vesala, T., and Zhang, W.: Importance of vegetation classes in modeling CH<sub>4</sub> emissions from boreal and subarctic wetlands in Finland, *Science of the Total Environment*, 572, 1111–1122, <https://doi.org/10.1016/j.scitotenv.2016.08.020>, <http://dx.doi.org/10.1016/j.scitotenv.2016.08.020>, 2016.
- 120 Müller, J. and Joos, F.: Global peatland area and carbon dynamics from the Last Glacial Maximum to the present – A process-based model investigation, *Biogeosciences*, 17, 5285–5308, <https://doi.org/10.5194/bg-17-5285-2020>, <https://bg.copernicus.org/articles/17/5285/2020/>, 2020.
- Ringeval, B., De Noblet-Ducoudré, N., Ciais, P., Bousquet, P., Prigent, C., Papa, F., and Rossow, W. B.: An attempt to quantify the impact of changes in wetland extent on methane emissions on the seasonal and interannual time scales, *Global Biogeochemical Cycles*, 24, 1–12, <https://doi.org/10.1029/2008GB003354>, 2010.
- 125 Shi, X., Thornton, P. E., Ricciuto, D. M., Hanson, P. J., Mao, J., Sebestyen, S. D., Griffiths, N. A., and Bisht, G.: Representing northern peatland microtopography and hydrology within the Community Land Model, *Biogeosciences*, 12, 6463–6477, <https://doi.org/10.5194/bg-12-6463-2015>, [www.biogeosciences.net/12/6463/2015/](http://www.biogeosciences.net/12/6463/2015/), 2015.
- 130 Sitch, S., Smith, B., Prentice, I. C., Arneth, A., Bondeau, A., Cramer, W., Kaplan, J. O., Levis, S., Lucht, W., Sykes, M. T., Thonicke, K., and Venevsky, S.: Evaluation of ecosystem dynamics, plant geography and terrestrial carbon cycling in the LPJ dynamic global vegetation model, *Global Change Biology*, 9, 161–185, <https://doi.org/10.1046/j.1365-2486.2003.00569.x>, 2003.
- Smith, B., Prentice, I. C., and Sykes, M. T.: Representation of vegetation dynamics in the modelling of terrestrial ecosystems: comparing two contrasting approaches within European climate space, *Global Ecology and Biogeography*, 10, 621–637, <https://doi.org/10.1046/j.1466-822x.2001.t01-1-00256.x>, 2001.
- 135 Stocker, B. D., Spahni, R., and Joos, F.: DYP TOP: A cost-efficient TOPMODEL implementation to simulate sub-grid spatio-temporal dynamics of global wetlands and peatlands, *Geoscientific Model Development*, 7, 3089–3110, <https://doi.org/10.5194/gmd-7-3089-2014>, 2014.
- van Huissteden, J., van den Bos, R., and Marticorena Alvarez, I.: Modelling the effect of water-table management on CO<sub>2</sub> and CH<sub>4</sub> fluxes from peat soils, *Geologie en Mijnbouw/Netherlands Journal of Geosciences*, 85, 3–18, <https://doi.org/10.1017/S0016774600021399>, 2006.
- 140 van Huissteden, J., Petrescu, a. M. R., Hendriks, D. M. D., and Rebel, K. T.: Sensitivity analysis of a wetland methane emission model based on temperate and Arctic wetland sites, *Biogeosciences*, 6, 9083–9126, <https://doi.org/10.5194/bgd-6-9083-2009>, 2009.
- Wania, R., Ross, L., and Prentice, I. C.: Integrating peatlands and permafrost into a dynamic global vegetation model: 1. Evaluation and sensitivity of physical land surface processes, *Global Biogeochemical Cycles*, 23, n/a–n/a, <https://doi.org/10.1029/2008GB003412>, <http://dx.doi.org/10.1029/2008GB003412>, <http://doi.wiley.com/10.1029/2008GB003412>, 2009.
- 145 Wania, R., Ross, L., and Prentice, I. C.: Implementation and evaluation of a new methane model within a dynamic global vegetation model: LPJ-WHyMe v1.3.1, *Geoscientific Model Development*, 3, 565–584, <https://doi.org/10.5194/gmd-3-565-2010>, 2010.
- Wu, J., Roulet, N. T., Moore, T. R., Lafleur, P., and Humphreys, E.: Dealing with microtopography of an ombrotrophic bog for simulating ecosystem-level CO<sub>2</sub> exchanges, *Ecological Modelling*, 222, 1038–1047, <https://doi.org/10.1016/j.ecolmodel.2010.07.015>, <http://dx.doi.org/10.1016/j.ecolmodel.2010.07.015>, 2011.
- 150 Wu, Y., Verseghy, D. L., and Melton, J. R.: Integrating peatlands into the coupled Canadian Land Surface Scheme (CLASS) v3.6 and the Canadian Terrestrial Ecosystem Model (CTEM) v2.0, *Geoscientific Model Development*, 9, 2639–2663, <https://doi.org/10.5194/gmd-9-2639-2016>, <https://gmd.copernicus.org/articles/9/2639/2016/>, 2016.
- 155 Yurova, A., Wolf, A., Sagerfors, J., and Nilsson, M.: Variations in net ecosystem exchange of carbon dioxide in a boreal mire: Modeling mechanisms linked to water table position, *Journal of Geophysical Research: Biogeosciences*, 112, G02025, <https://doi.org/10.1029/2006JG000342>, <http://doi.wiley.com/10.1029/2006JG000342>, 2007.
